# Supplementary material
Source: PubMed Central journal article supplement (PMC5850514)
Supplement: msx298_supplementary_files_v4.pdf [file msx298_supplementary_files_v4.pdf]

1 **Supplementary Material**

2 **Supplementary Table 1: The rs6761637 SNP is in LD with other polymorphisms**  
 3 **associated with infection**

| SNP        | R <sup>2</sup> | χ <sup>2</sup> | p-value | Source | Location          | Phenotype   |
|------------|----------------|----------------|---------|--------|-------------------|-------------|
| rs2278589  | 0.2914         | 60.0213        | <0.0001 | CHB    | Intron 1          | <i>Mtb+</i> |
| rs6751745  | 0.3729         | 76.9289        | <0.0001 | CHB    | Intron 13         | <i>Mtb+</i> |
| rs17009726 | 0.932          | 191.9832       | <0.0001 | CHB    | Intron 1          | <i>Mtb+</i> |
| rs12998782 | 0.6245         | 128.6414       | <0.0001 | CHB    | Intron 1          | <i>Mtb+</i> |
| rs13389814 | 0.7092         | 160.2789       | <0.0001 | GWD    | Intron 16         | <i>Mtb+</i> |
| rs12998782 | 0.0141         | 3.1829         | 0.0744  | GWD    | Intron 1          | <i>Mtb+</i> |
| rs4491733  | 0.0051         | 1.144          | 0.2848  | GWD    | Intron 1          | <i>Mtb+</i> |
| rs7559955  | 0.0141         | 3.1829         | 0.0744  | GWD    | Intron 1          | <i>Mtb-</i> |
| rs41279766 | 0.0001         | 0.0744         | 0.7851  | EUR    | Exon3<br>(Spacer) | Sepsis      |

4 Abbreviations: CHB = Han Chinese in Beijing (n=120), GWD = Gambian in Western Africa  
 5 (n=179), EUR = European (n=535), *Mtb+* = Pulmonary Tuberculosis Susceptibility, *Mtb-* =  
 6 Pulmonary Tuberculosis Resistance.

7 1. Footnotes: rs2278589, and rs6751745 were linked to *Mtb* susceptibility by Thuong *et al*  
 8 (2016). rs17009726 was linked to *Mtb* susceptibility by Ma *et al* (2011). rs12998782 was  
 9 linked to *Mtb* susceptibility by Lao *et al* (2017). rs13389814, rs12998782, rs4491733,  
 10 and rs7559955 were linked to *Mtb* susceptibility and resistance by Bowdish *et al* (2013).  
 11 rs41279766 was linked to sepsis in COPD patients by Thomsen *et al* (2012).

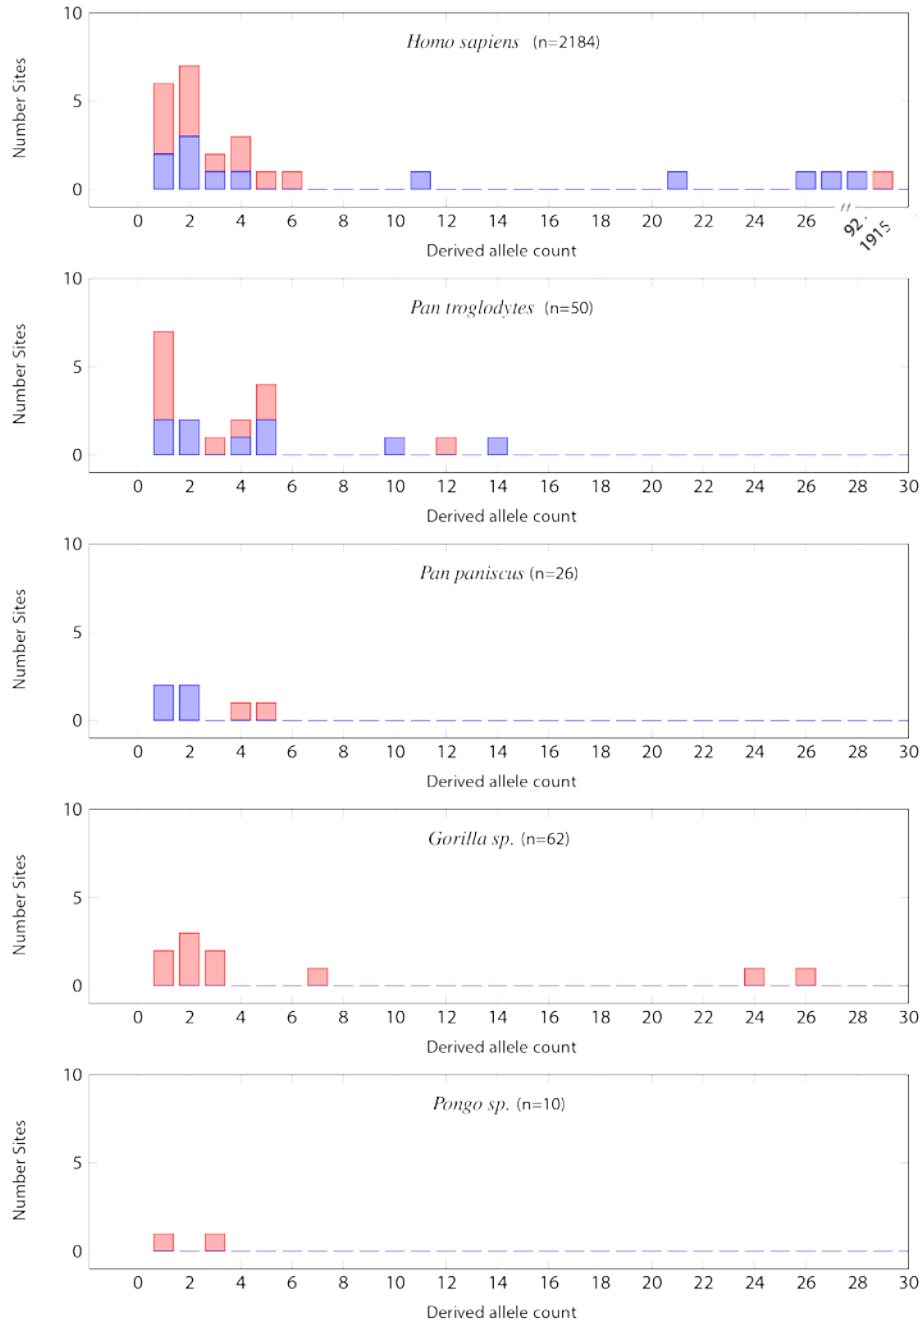

14 **Supplementary Figure 1: A site frequency spectrum of MARCO SNPs across primate**  
 15 **species.** The site frequency spectra for MARCO are shown for each of the primate species.  
 16 Red squares indicate non-synonymous changes while the blue squares indicate synonymous  
 17 changes. The largest number of derived alleles in humans is at residue 282, with 1915 derived  
 18 alleles. Note that the species have not been randomly sampled and hence these cannot be  
 19 considered proper spectra. The y-axes each indicate the count of the number of observed sites  
 20 with the observed number of variant alleles. The sample sizes are shown in parentheses. The  
 21 human spectrum has a discontinuous x-axis.

Supplementary Table 2: Human variation within MARCO.

| Population | 119699906-Syn | 119699932-Non | 119699959-Non | 119726770-Syn | 119727706-Syn | 119727771-Non | 119727793-Non | 119727815-Non | 119727909-Non | 119732104-Syn | 119732135-Non | 119732139-Non | 119739063-Non | 119739077-Non | 119739738-Non | 119739754-Syn | 119739784-Syn | 119739799-Syn | 119739817-Syn | 119748203-Syn | 119750815-syn | 119751997-syn | 119752006-Syn | 119752029-Non | 119752090-Syn | 119752091-Non |
|------------|---------------|---------------|---------------|---------------|---------------|---------------|---------------|---------------|---------------|---------------|---------------|---------------|---------------|---------------|---------------|---------------|---------------|---------------|---------------|---------------|---------------|---------------|---------------|---------------|---------------|---------------|
|            | Total         | $\theta_H$    | H             | $\theta_W$    | $\theta_\pi$  | D             |               |               |               |               |               |               |               |               |               |               |               |               |               |               |               |               |               |               |               |               |
| ASW        | 122           | 1.07          | -0.30         | 1.12          | 0.77          | -0.68         |               |               |               |               |               |               |               |               |               |               |               |               |               |               |               |               |               |               |               |               |
| CEU        | 170           | 1.81          | -1.55         | 0.88          | 0.26          | -1.38         |               |               |               |               |               |               |               |               |               |               |               |               |               |               |               |               |               |               |               |               |
| CHB        | 194           | 1.37          | -1.00         | 0.86          | 0.37          | -1.09         |               |               |               |               |               |               |               |               |               |               |               |               |               |               |               |               |               |               |               |               |
| CHS        | 200           | 1.45          | -1.14         | 1.02          | 0.32          | -1.40         |               |               |               |               |               |               |               |               |               |               |               |               |               |               |               |               |               |               |               |               |
| CLM        | 120           | 1.86          | -1.57         | 1.12          | 0.29          | -1.62*        |               |               |               |               |               |               |               |               |               |               |               |               |               |               |               |               |               |               |               |               |
| FIN        | 186           | 1.95          | -1.84         | 0.86          | 0.11          | -1.70*        |               |               |               |               |               |               |               |               |               |               |               |               |               |               |               |               |               |               |               |               |
| GBR        | 178           | 1.84          | -1.66         | 0.69          | 0.17          | -1.35         |               |               |               |               |               |               |               |               |               |               |               |               |               |               |               |               |               |               |               |               |
| IBS        | 28            | 1.79          | -1.51         | 0.77          | 0.28          | -1.53         |               |               |               |               |               |               |               |               |               |               |               |               |               |               |               |               |               |               |               |               |
| JPT        | 178           | 1.83          | -1.73*        | 0.52          | 0.11          | -1.29         |               |               |               |               |               |               |               |               |               |               |               |               |               |               |               |               |               |               |               |               |
| LWK        | 194           | 1.23          | -0.23         | 1.71          | 1.01          | -0.97         |               |               |               |               |               |               |               |               |               |               |               |               |               |               |               |               |               |               |               |               |
| MXL        | 132           | 1.75          | -1.43         | 1.10          | 0.32          | -1.52         |               |               |               |               |               |               |               |               |               |               |               |               |               |               |               |               |               |               |               |               |
| PUR        | 110           | 1.81          | -1.56         | 1.14          | 0.25          | -1.73*        |               |               |               |               |               |               |               |               |               |               |               |               |               |               |               |               |               |               |               |               |
| TSI        | 196           | 1.81          | -1.58         | 1.03          | 0.23          | -1.58*        |               |               |               |               |               |               |               |               |               |               |               |               |               |               |               |               |               |               |               |               |
| YRI        | 176           | 0.91          | -0.03         | 0.70          | 0.88          | 0.47          |               |               |               |               |               |               |               |               |               |               |               |               |               |               |               |               |               |               |               |               |
| AFR        | 492           | 1.06          | -0.16         | 1.48          | 0.91          | -0.82         |               |               |               |               |               |               |               |               |               |               |               |               |               |               |               |               |               |               |               |               |
| AMR        | 362           | 1.79          | -1.50         | 1.70          | 0.29          | -1.88*        |               |               |               |               |               |               |               |               |               |               |               |               |               |               |               |               |               |               |               |               |
| EAS        | 572           | 1.53          | -1.25         | 1.44          | 0.28          | -1.69*        |               |               |               |               |               |               |               |               |               |               |               |               |               |               |               |               |               |               |               |               |
| EUR        | 758           | 1.84          | -1.65         | 1.25          | 0.18          | -1.68*        |               |               |               |               |               |               |               |               |               |               |               |               |               |               |               |               |               |               |               |               |
| ALL        | 2184          | 1.54          | -1.12         | 3.15          | 0.42          | -2.01*        |               |               |               |               |               |               |               |               |               |               |               |               |               |               |               |               |               |               |               |               |

The variation within MARCO was analyzed using the human genomes from PhaseI of the 1000 Human genome project (v3.20101123). The SNPs for each population along with estimates for Fay & Wu's estimate of  $\theta_H$ , Fay & Wu's  $H$  statistic, Watterson's estimate of  $\theta_W$ , Tajima's estimate of  $\theta_\pi$  and Tajima's statistic D are shown. Simulations were carried out as described in the Methods section. Estimates of D that are significant ( $\text{Pr} < 0.025$ ; two-tailed) are shown by asterisks. One of the estimates of H is significant. The simulations are based on a simple basic neutral model, with constant population size, no recombination, no selection, random mating, and an infinite-sites model. However the actual history of the human population is complex, with a large number of demographic parameters that have not been explored. As such none of these 'populations' meet the assumptions of this test. Therefore we consider these tests to be only suggestive and justification to gather further experimental evidence. In the majority of the 'populations' the high frequency of the derived allele at position 282 (119739063bp in chromosome 2) stands out. Hence we further examined this SNP.

(The 'populations' listed are ASW - Americans of African Ancestry in SW USA, CEU - Utah Residents (CEPH) with Northern and Western European Ancestry, CHB - Han Chinese in Beijing, China, CHS - Southern Han Chinese, CLM - Colombians from Medellin, Colombia, FIN - Finnish in Finland, GBR - British in England and Scotland, IBS - Iberian Population in Spain, JPT - Japanese in Tokyo, Japan, LWK - Luhya in Webuye, Kenya, MXL - Mexican Ancestry from Los Angeles USA, PUR - Puerto Ricans from Puerto Rico, TSI - Toscani in Italia, YRI - Yoruba in Ibadan, Nigeria. The 'super populations' listed are AFR African, AMR Ad Mixed American, EAS East Asian, EUR European)
